# Supplementary material for: Real-Time Characterization of Clonal Fate Decisions in Complex Leukemia Samples by Fluorescent Genetic Barcoding
Source: MDPI journal article supplement (doi:10.3390/cells11244045), 2022-12-14
Supplement: s1 [file s1]

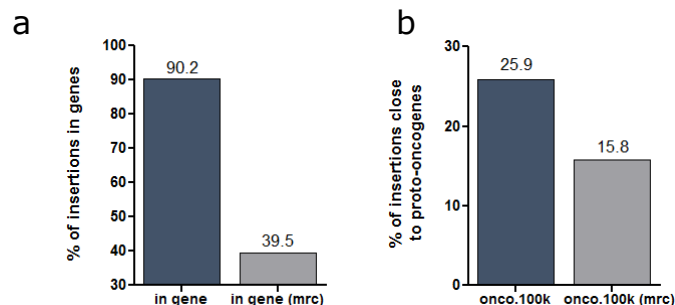

**Figure S3: Integration site preferences in color-coded H9M<sup>-/-</sup> clones. (a)** Distribution of in-gene insertions in H9M<sup>-/-</sup> clones (dark blue) and a mixed random control (grey). **(b)** Distribution of integrations in H9M<sup>-/-</sup> clones in the vicinity of proto-oncogenes (dark blue) and a mixed random control (grey).
