# Supplementary material for: Real-Time Characterization of Clonal Fate Decisions in Complex Leukemia Samples by Fluorescent Genetic Barcoding
Source: MDPI journal article supplement (doi:10.3390/cells11244045), 2022-12-14
Supplement: s1 [file s1]

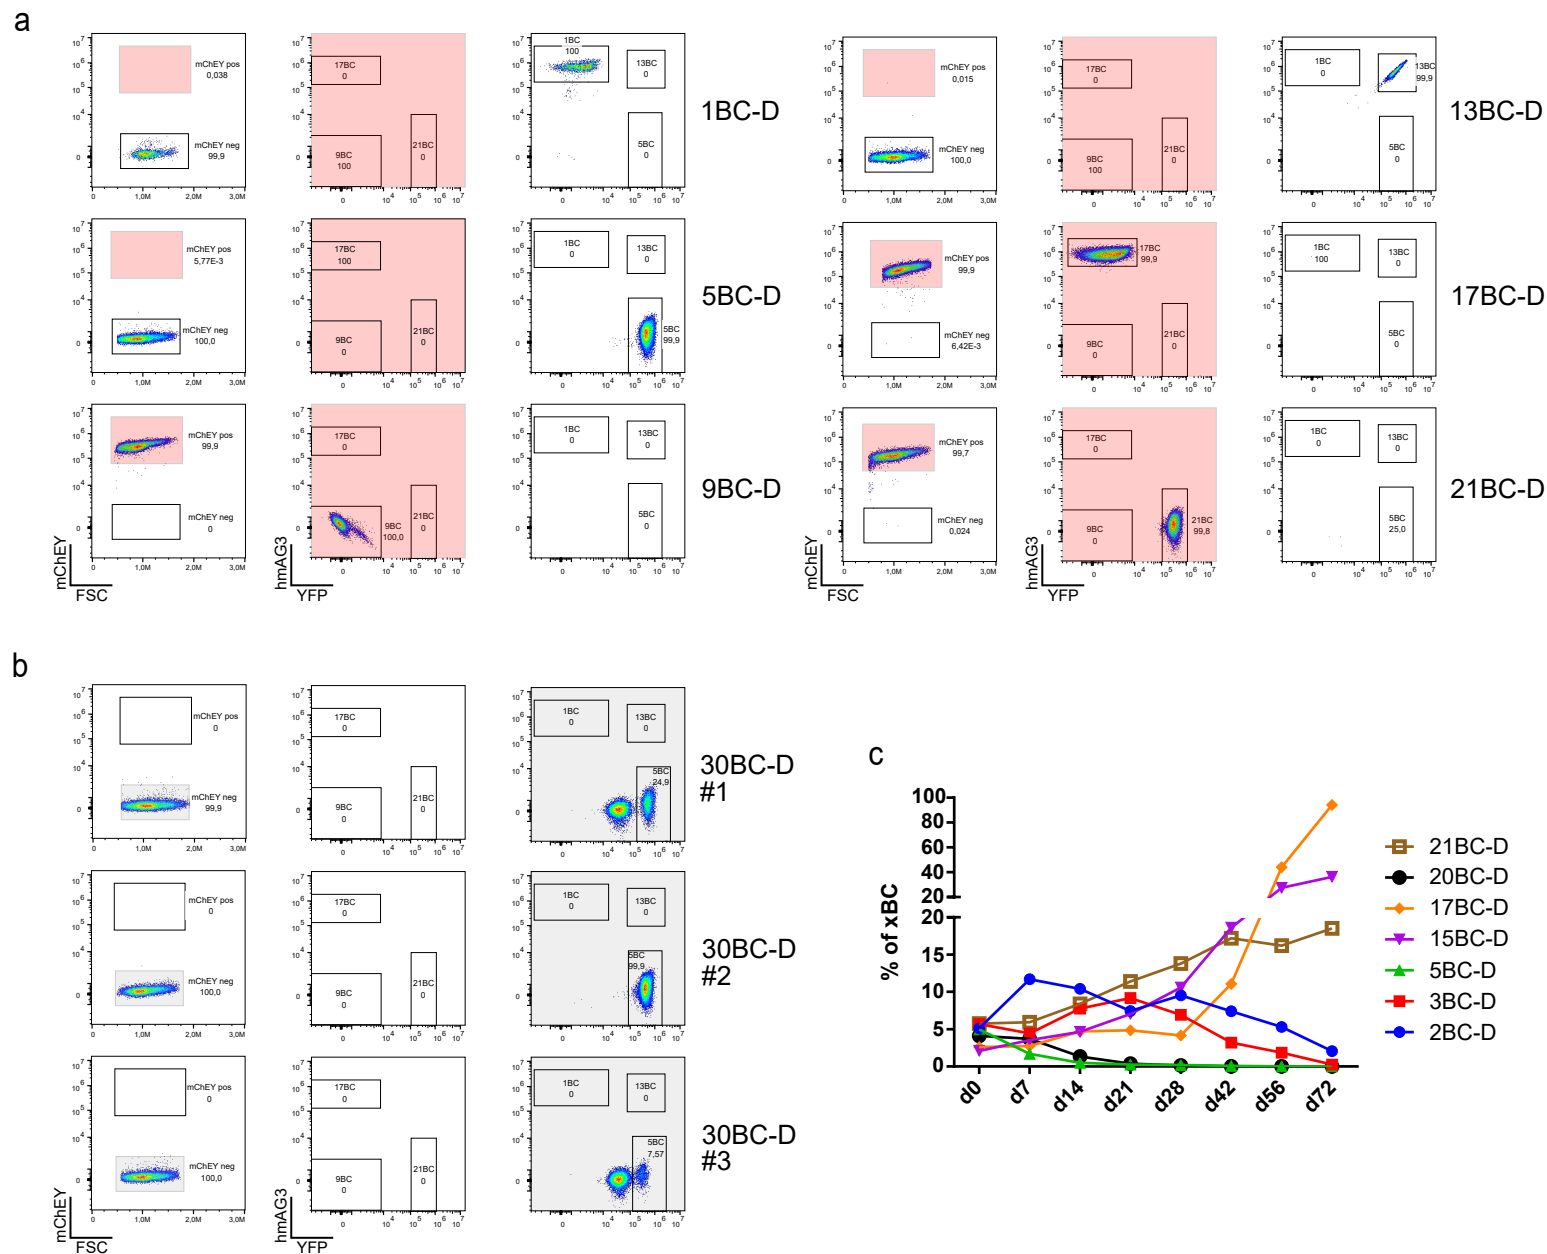

**Figure S4: Exemplified flow cytometric analysis of selected color-coded clones. (a-b)** FGB-D H9M<sup>-/-</sup>-derived color-coded clones were subjected to flow cytometric analyses to determine signal specificities based on fluorescent marker expression. **(a)** Samples with single defined fluorescent populations. **(b)** Clones #1-3 of 30BC-D transduced H9M<sup>-/-</sup>-samples with only a single fluorescent population in clone #2, while clones #1 and #3 showed rare signs of variegated vector expression. **(c)** Exemplified clonal growth pattern extracted from Figure 3d (transient expansion: 2BC-D and 3BC-D; extinction: 5BC-D and 20BC-D; longitudinal expansion: 15BC-D and 21-BC-D) and Figure 3f (delayed expansion: 17BC-D\*).
