# Supplementary material for: Real-Time Characterization of Clonal Fate Decisions in Complex Leukemia Samples by Fluorescent Genetic Barcoding
Source: MDPI journal article supplement (doi:10.3390/cells11244045), 2022-12-14
Supplement: s1 [file s1]

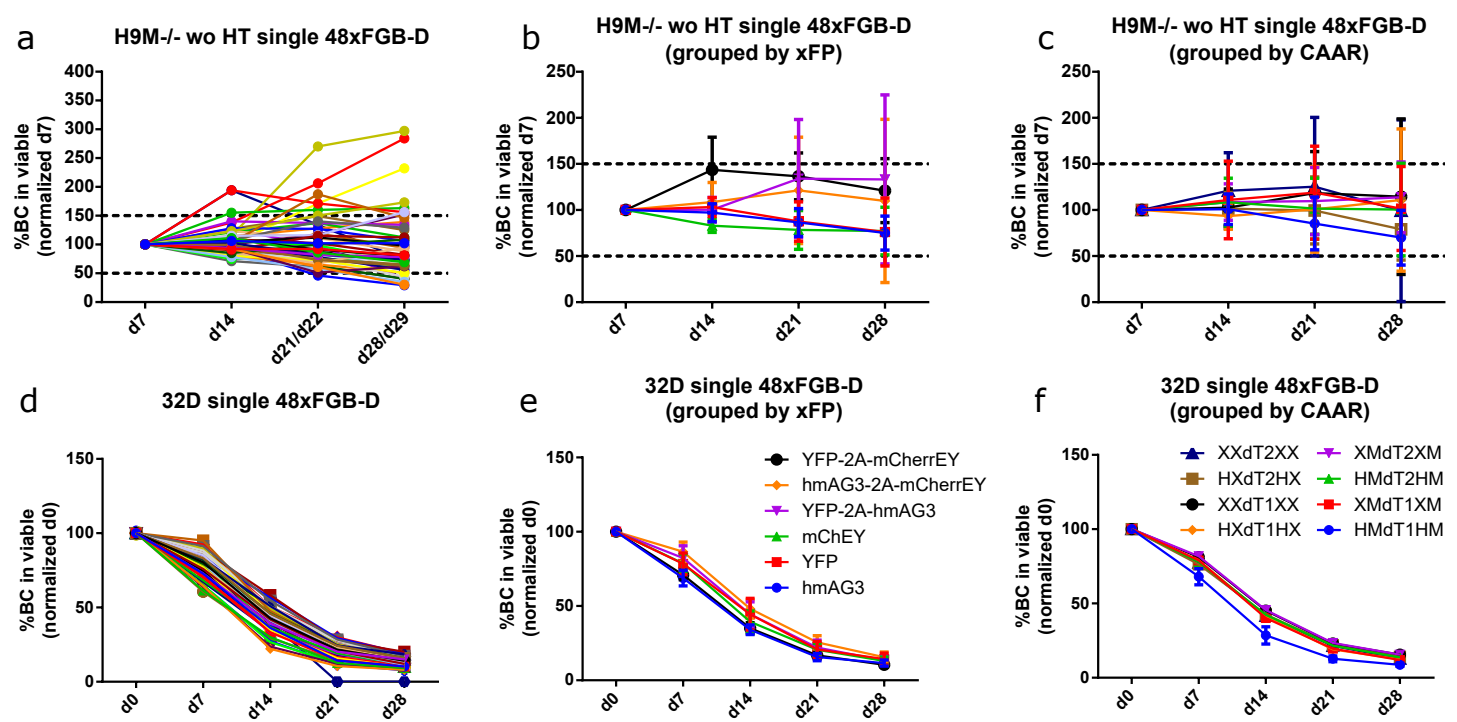

**Figure S2: FGB-D vectors provide stable expression over time in H9M<sup>-/-</sup> cells and yield specific signals in mixed cultures.** (a-c) H9M<sup>-/-</sup> cells were transduced with all 48 FGB-D vectors in individual wells for longitudinal tracking by fluorescent marker expression in the absence of HT-supplementation. All data were normalized to the gene marking rate in the beginning (d7) of the tracking experiment. (a) Normalized gene marking rates for all 48 FGB-D transduced samples. (b) Normalized gene marking rate of cells from (a) grouped according to fluorescent markers (n=6). (c) Normalized gene marking rate of cells from A grouped according to CAAR (n=8). (d-f) 32D cells were transduced with all 48 FGB-D vectors in individual wells for longitudinal tracking by fluorescent marker expression. All data were normalized to the gene marking rate in the beginning (d0) of the tracking experiment. (d) Normalized gene marking rates for all 48 FGB-D transduced samples. (e) Normalized gene marking rate of cells from (a) grouped according to fluorescent markers (n=6). (f) Normalized gene marking rate of cells from (a) grouped according to CAAR (n=8). Notably, in (d-f) sample 48BC-D (YFP-2A-mCherrEY-P2A-XXdT2XX) could not be measured at day 21 and 28.
